# Supplementary material for: Gut microbiota diversity before allogeneic hematopoietic stem cell transplantation as a predictor of mortality in children
Source: PubMed Central journal article supplement — Blood. 2023 Aug 10;142(16):1387–98. doi: 10.1182/blood.2023020026 (PMC10651870; doi:10.1182/blood.2023020026), 2023-08-10
Supplement: BLOOD_BLD-2023-020026-mmc1.pdf [file BLOOD_BLD-2023-020026-mmc1.pdf]

**GUT MICROBIOTA DIVERSITY BEFORE  
ALLOGENEIC HEMATOPOIETIC STEM CELL  
TRANSPLANTATION AS PREDICTOR OF  
MORTALITY IN CHILDREN**

**Supplemental Material**

Correspondence: *m.fabbrini@unibo.it*

**Supplemental Figure 1. Gut microbiota diversity before allo-HSCT and at neutrophil engraftment (take).** Panel **A** shows data for the overall cohort and panel **B** for each participating center. Comparisons were performed with FDR-corrected Wilcoxon rank-sum tests and only significant comparisons are reported: \*\*\*\*,  $p < 0.0001$ ; \*\*,  $p \leq 0.01$ .

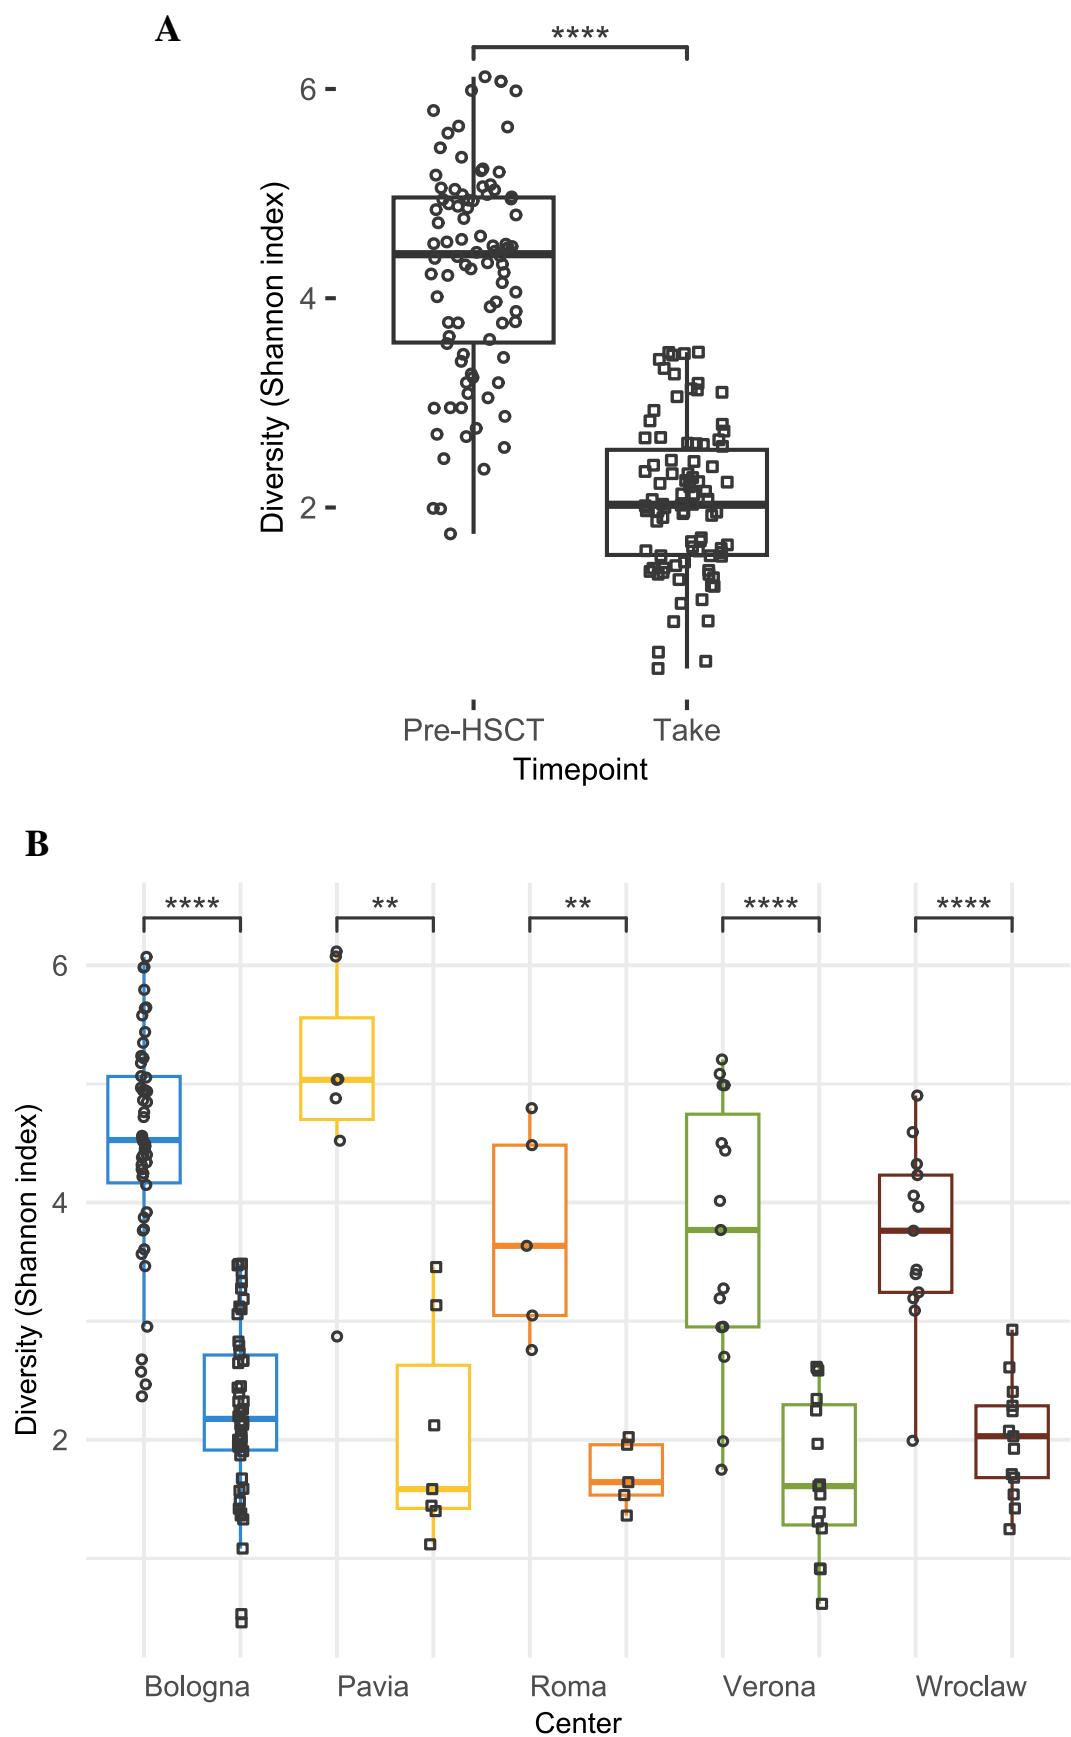

**Supplemental Figure 2. Distribution of gut microbiota diversity by patient age (in years).** Panel **A** shows data for samples collected before allo-HSCT and panel **B** for those collected at neutrophil engraftment.

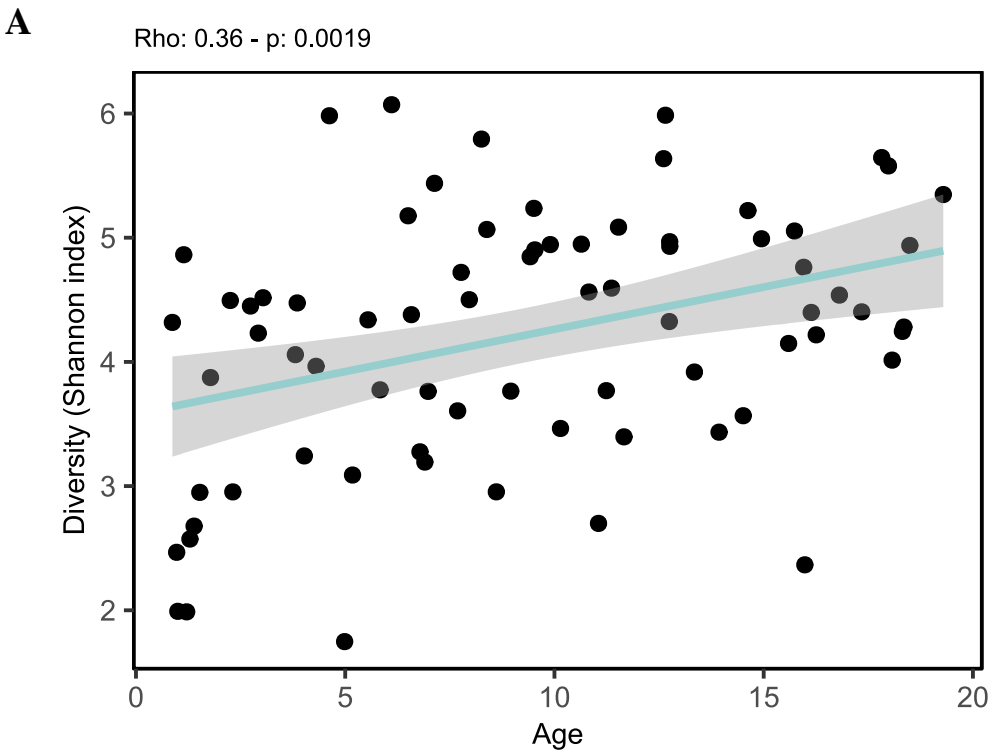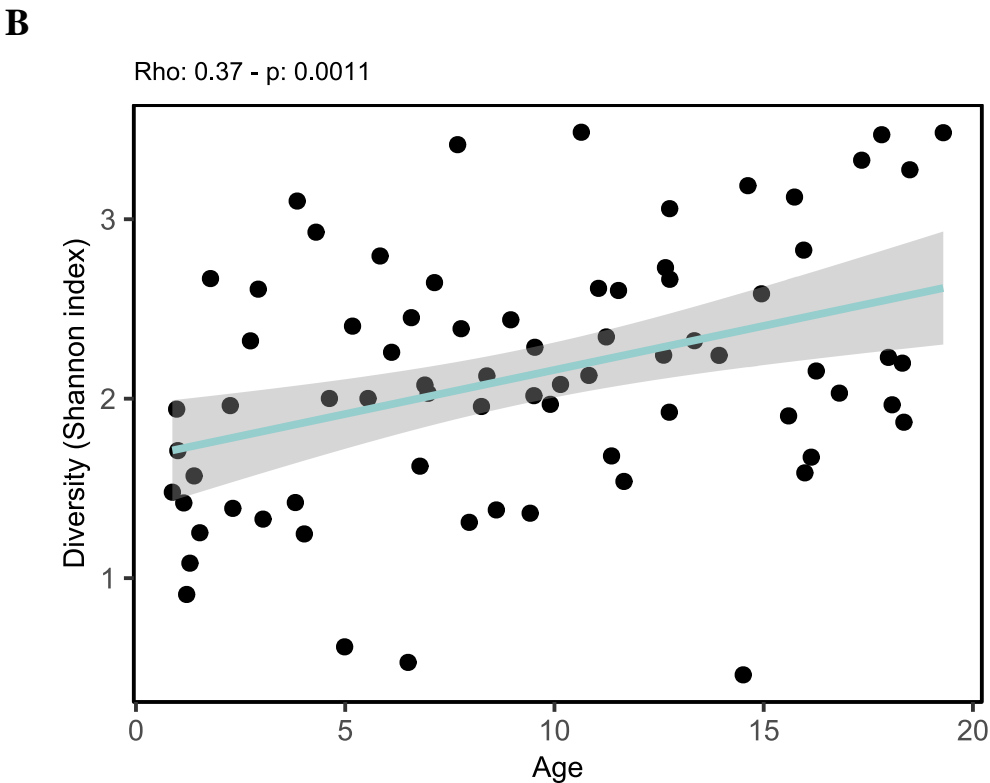

**Supplemental Figure 3. Gut microbiota diversity in allo-HSCT patients aged less than (or equal to) or over three years.** Panel **A** shows data for samples collected before allo-HSCT and panel **B** for those collected at neutrophil engraftment. Comparisons were performed with Wilcoxon rank-sum tests: \*\*,  $p = 0.0021$ ; \*  $p = 0.013$ .

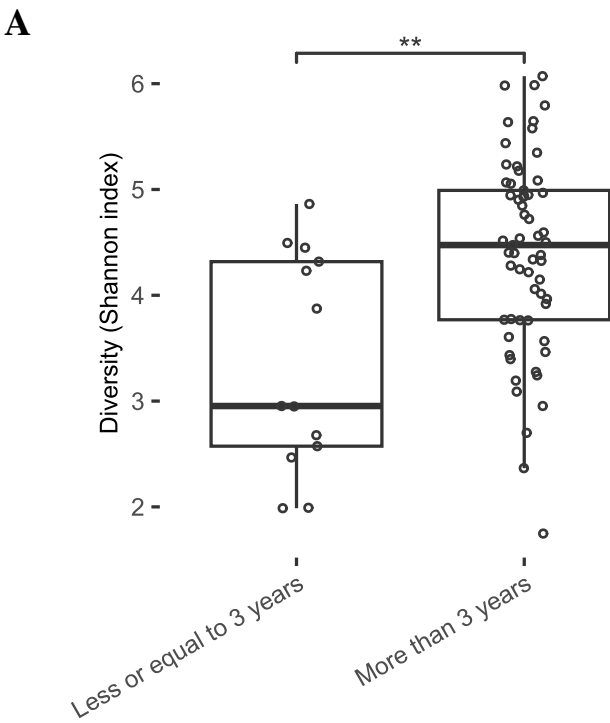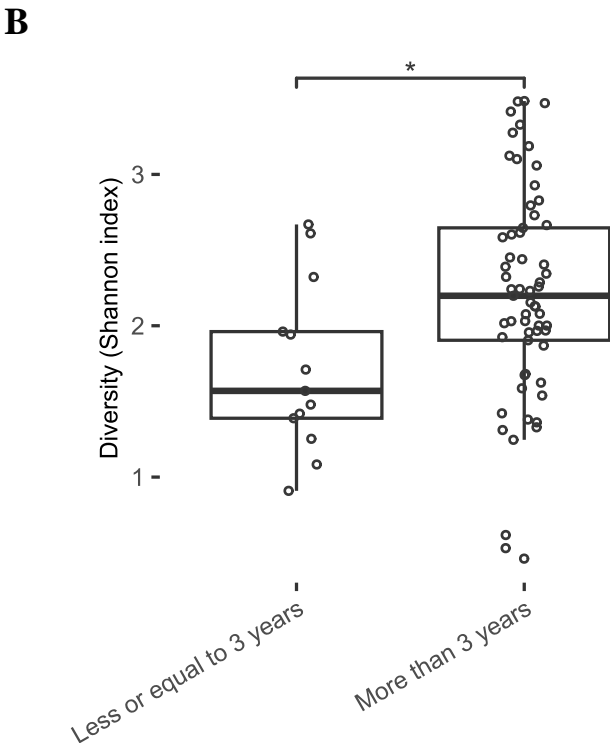

**Supplemental Figure 4. Association between pre-allo-HSCT gut microbiota diversity and clinical outcomes.** Cumulative incidence in the higher- and lower-diversity groups before transplantation for relapse (A), any grade acute graft-versus-host disease (aGvHD, C), gut aGvHD (D), bloodstream infection (BSI, E) and transplant-related mortality (F). Kaplan-Meier estimate for relapse-free survival for the two diversity groups (B).

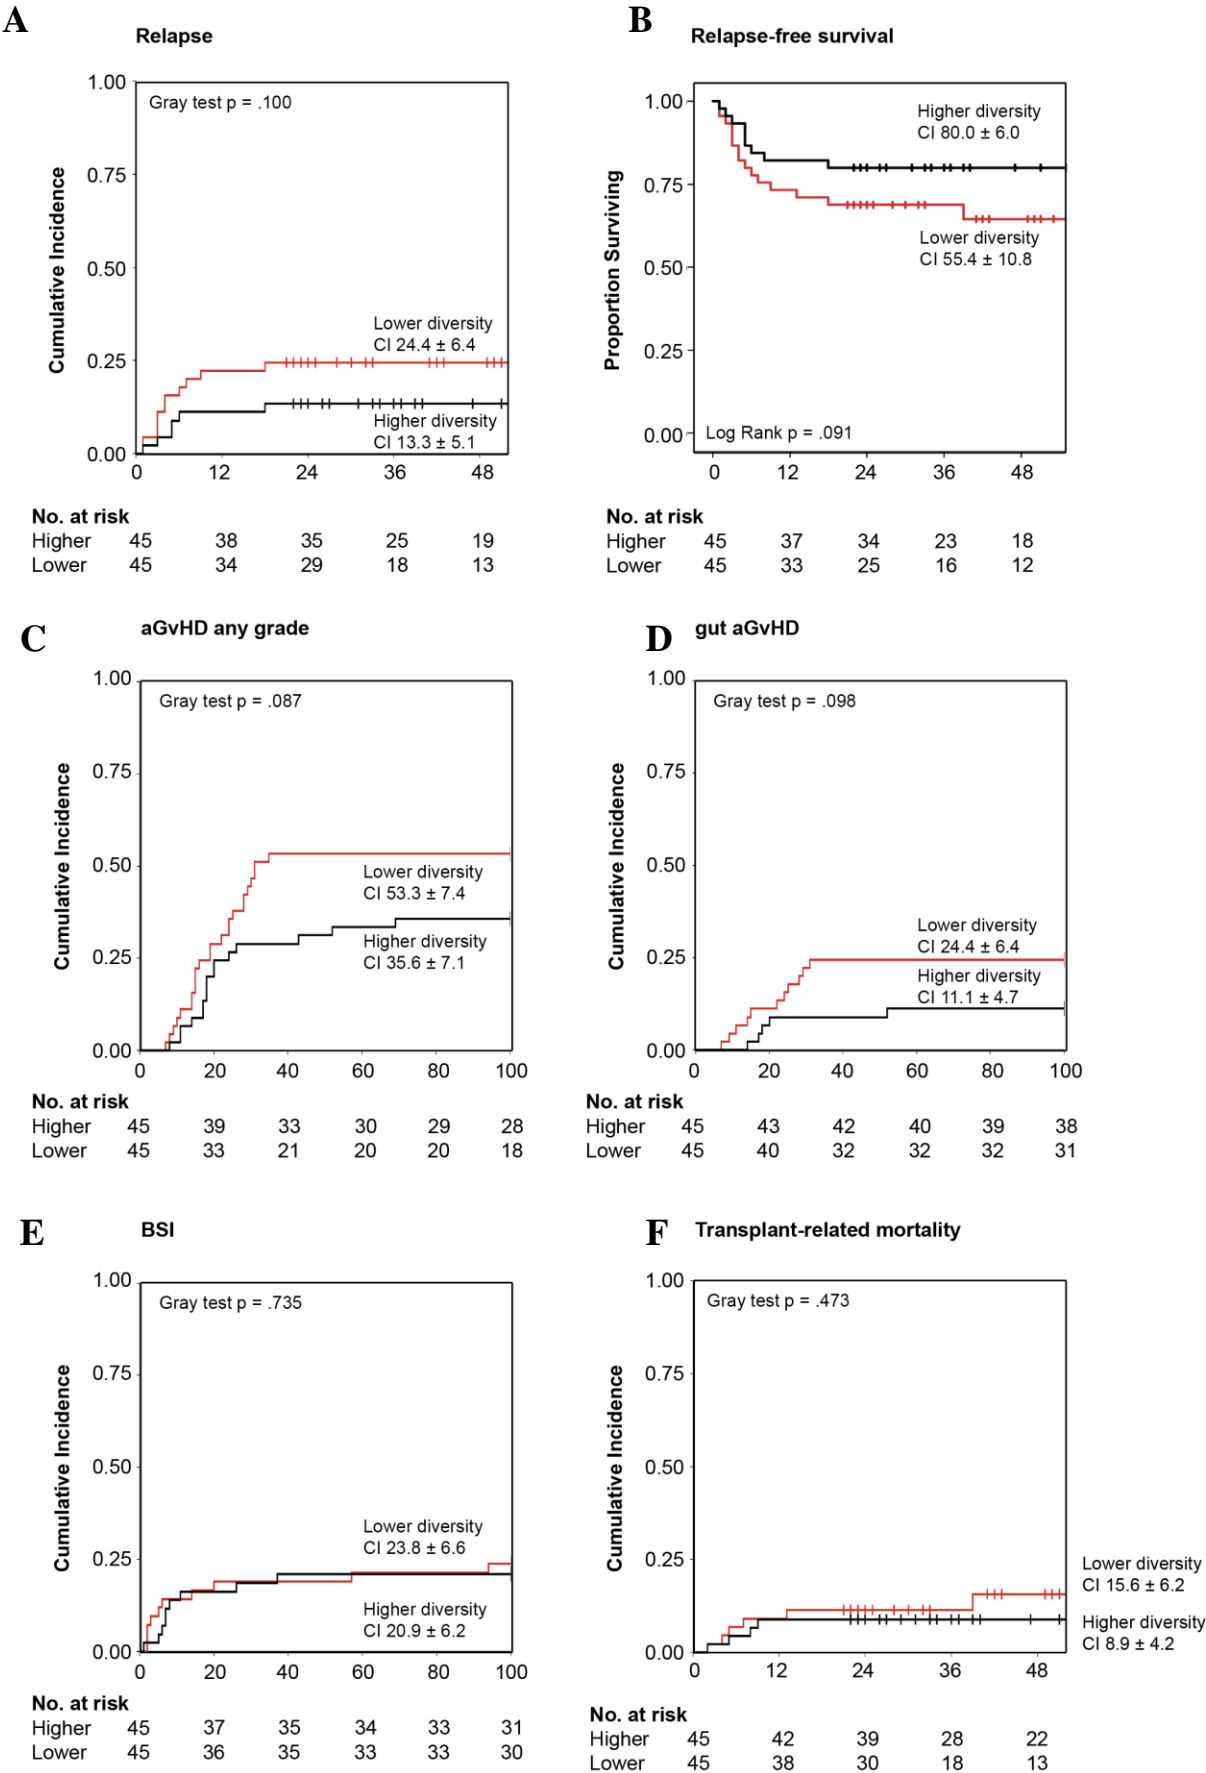

Supplemental Figure 5. Kaplan-Meier estimate for overall survival for the higher- and lower-diversity groups based on gut microbiota diversity at neutrophil engraftment.

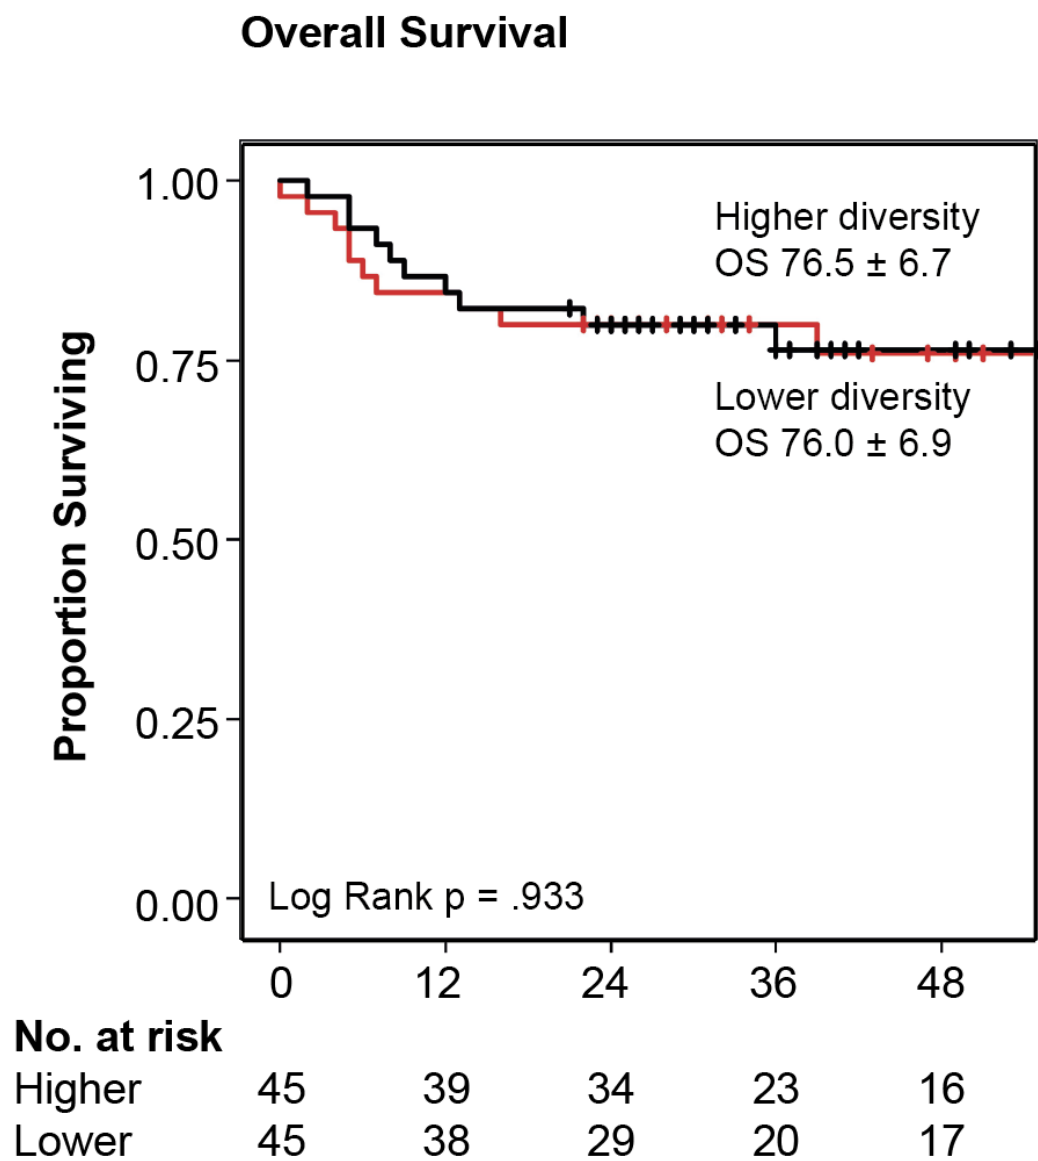

**Supplemental Figure 6. Impact of antibiotic administration before allo-HSCT over gut microbiota diversity and composition.** Antibiotic exposure duration (in days) prior to allo-HSCT in the higher- and lower-diversity groups (A); Pre-allo-HSCT diversity values in patients exposed or not to antibiotic therapy (B); relative abundance of *Enterococcaceae* and *Enterobacteriaceae* at engraftment time-point in patients exposed or not glycopeptides (GP, C) and other classes of antibiotics (cefazidime or cefepime - CEF, piperacillin-tazobactam – P-T, and meropenem – MER, D) during the pre-engraftment period (*i.e.*, from HSCT to engraftment). Student T-test/Mann-Whitney test: \*\*,  $p < 0.01$  ; \*,  $p < 0.05$ .

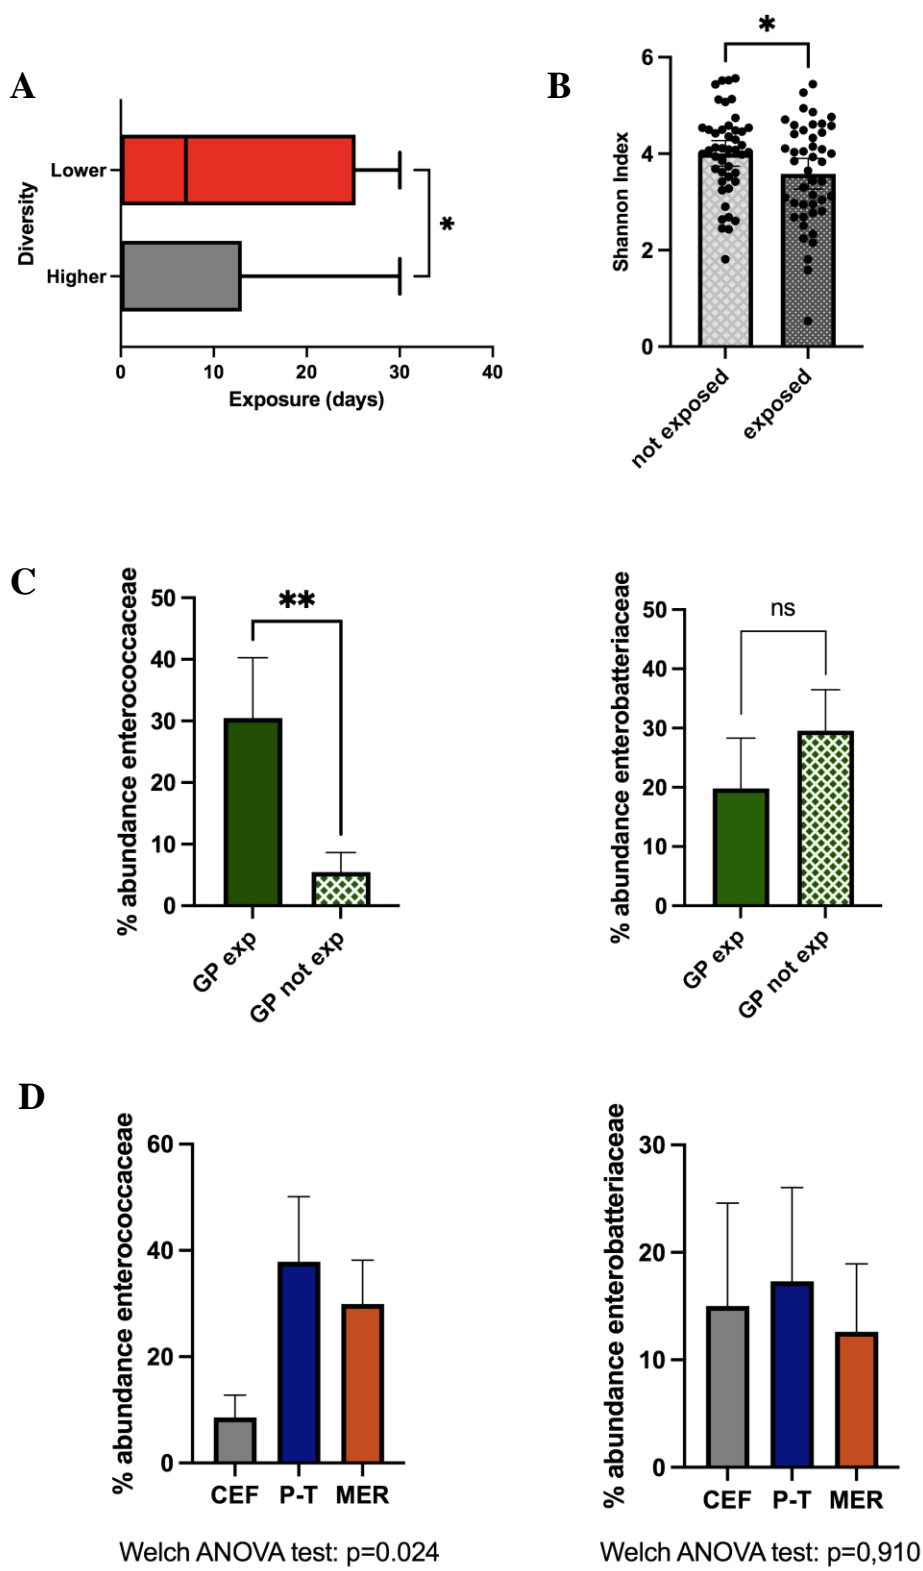

**Supplemental Figure 7. Gut microbiota diversity and composition at neutrophil engraftment.** (A) Boxplots showing the distribution of alpha diversity estimated with the Shannon index according to patient survival outcome (alive vs dead). Significant differences in the gut microbiota composition at the family (B) and genus (C) level between the higher- and lower-diversity groups. FDR-corrected Wilcoxon rank-sum tests. \*\*\*,  $p < 0.001$ ; \*\*,  $p < 0.01$ ; \*,  $p < 0.05$ ; °,  $p < 0.1$  (considered as a trend); NS, not significant ( $p \geq 0.1$ ).

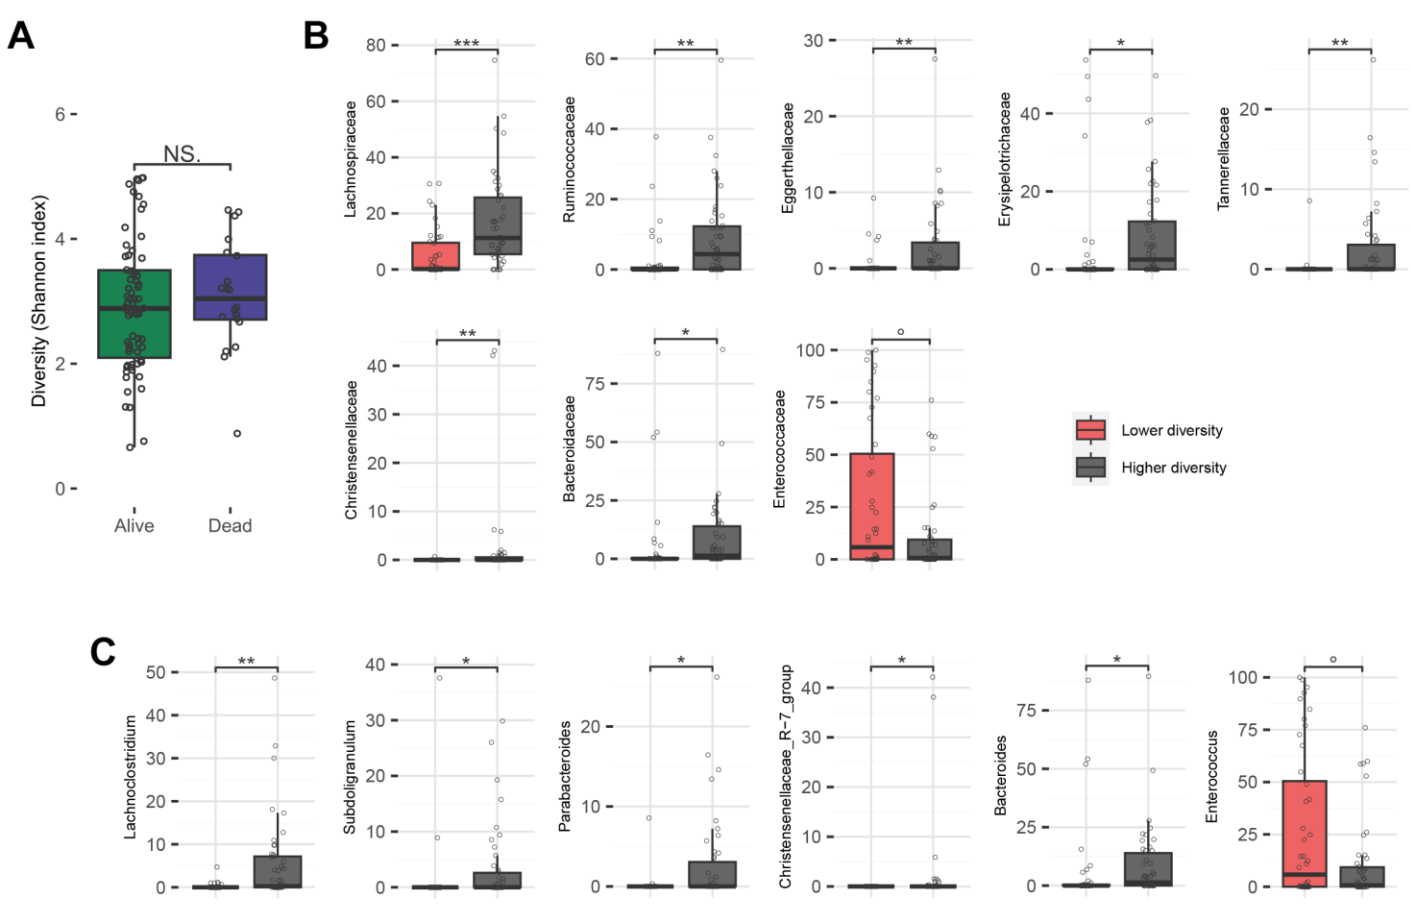

**Supplemental Figure 8. Differences in gut microbiota at neutrophil engraftment represented using t-SNE plots.**

The gut microbiota composition at the genus level of the 90 patients at neutrophil engraftment is represented according to the t-distributed stochastic neighbor embedding (t-SNE) algorithm. The more similar the samples are in microbiota composition, the closer they appear on the t-SNE plot. Higher-diversity samples (A) congregate in the center, but do not co-localize with favorable survival outcome (B). The upper and lower part of the t-SNE space is mostly composed of lower-diversity samples, which show higher presence of *Escherichia-Shigella*, *Enterococcus*, and *Streptococcus* when color-coded for the most abundant taxon detected (C). No evident trends can be appreciated for the onset of acute graft-versus-host disease (aGvHD) (D).

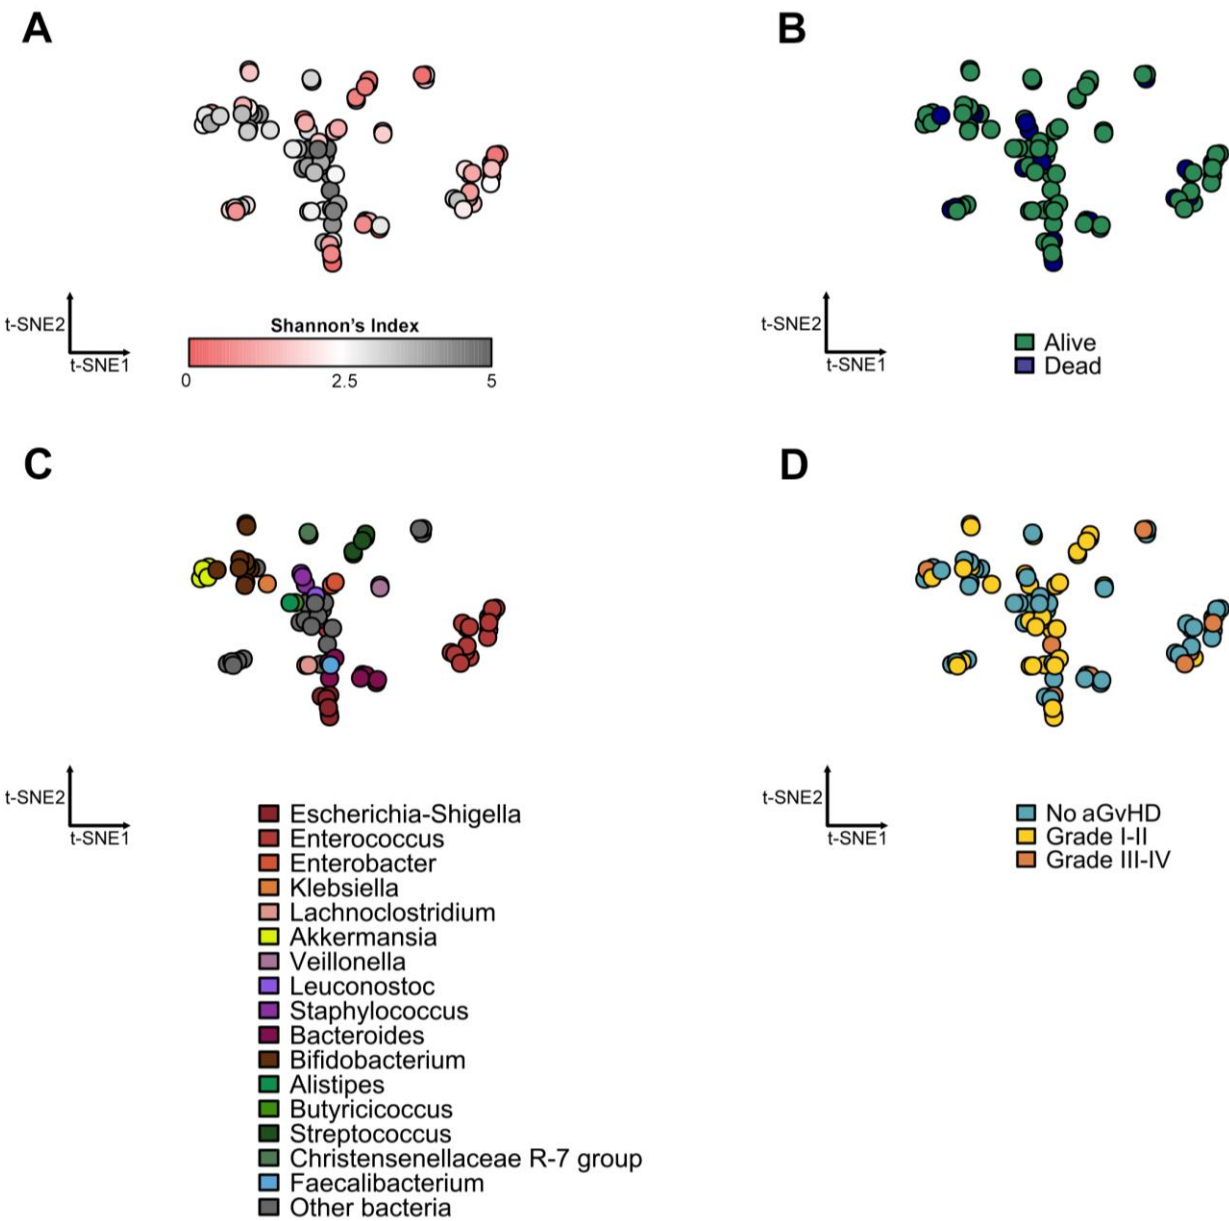

**Supplemental Figure 9. Pre-allo-HSCT gut microbiota signatures related to aGvHD onset.** Boxplots showing the distribution of alpha diversity estimated with the Shannon index in patients not developing aGvHD vs those developing grade I-II or grade III-IV aGvHD (A). Significant differences in the gut microbiota composition related to aGvHD (B). FDR-corrected Wilcoxon rank-sum tests. \*\*,  $p < 0.01$ ; \*,  $p < 0.05$ ; °,  $p < 0.1$  (considered as a trend); NS, not significant ( $p \geq 0.1$ ).

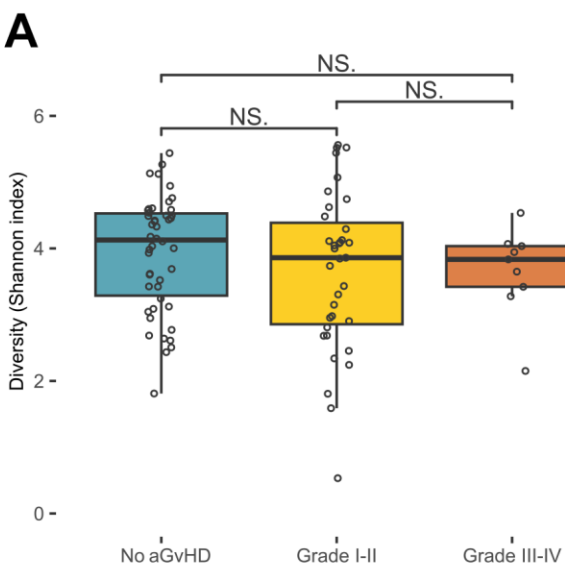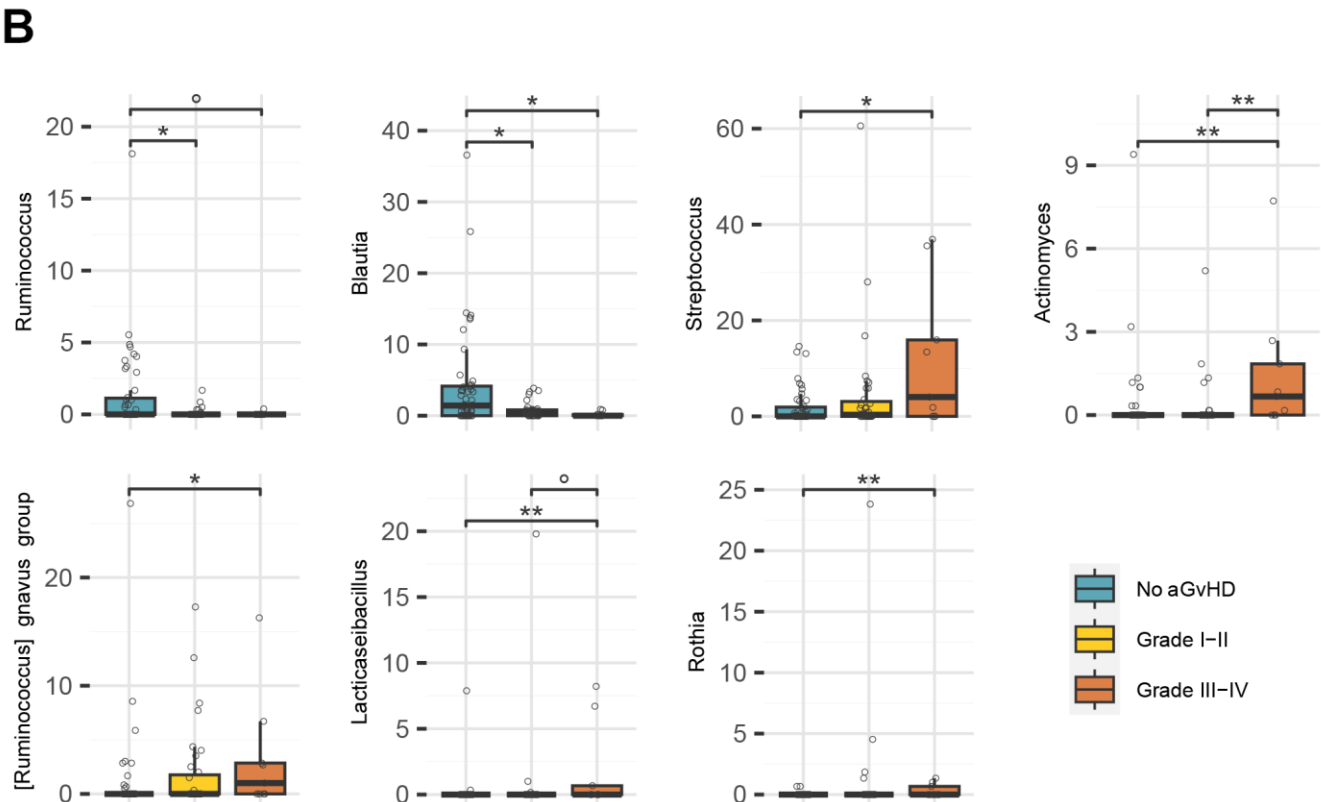

**Supplemental Figure 10. Gut microbiota networks of the higher- and lower-diversity groups at neutrophil engraftment.** (A) Correlation networks of interactions reconstructed from genus-level compositional data in the lower- and higher-diversity groups at neutrophil engraftment. Violet lines represent negative interactions, whilst solid grey lines stand for positive ones. Node size is proportional to the overabundance value of the corresponding genus in the gut microbiota configuration of the diversity group considered. Only nodes corresponding to genera showing overabundance  $\geq 1.4$  were displayed. Labels were displayed only for genera showing overabundance of at least 1.5. Nine different modules were detected according to a statistical mechanics spin-glass model and simulated annealing. (B) Values of computed network features (*i.e.*, modularity, ratio of negative to positive cohesions – N:P ratio, and total cohesion).

A

Lower diversity

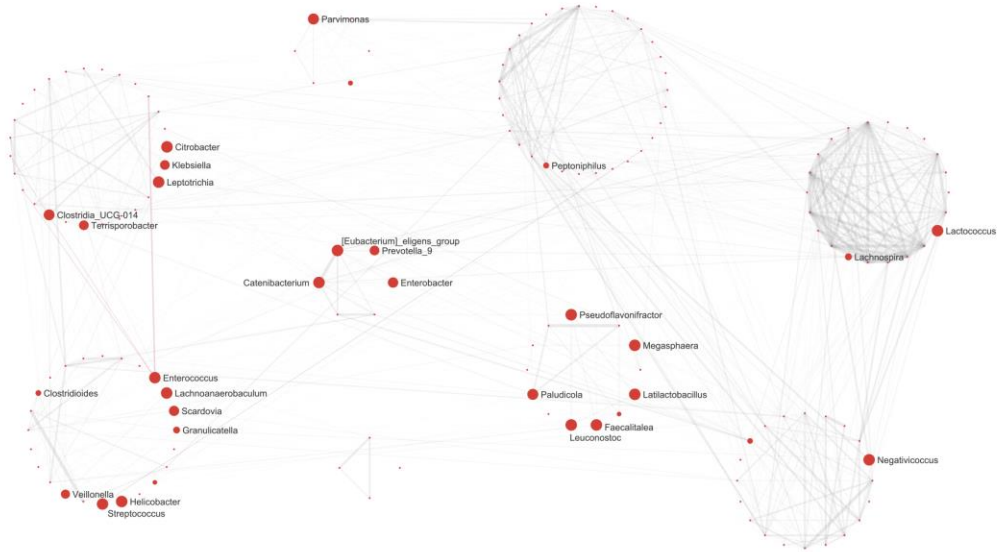

B

Higher diversity

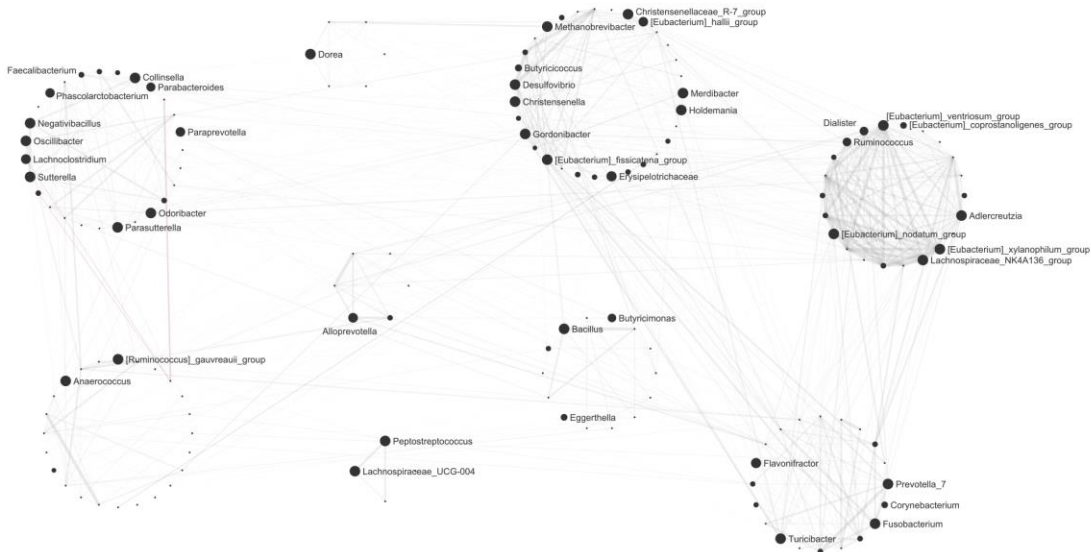

C

Network features

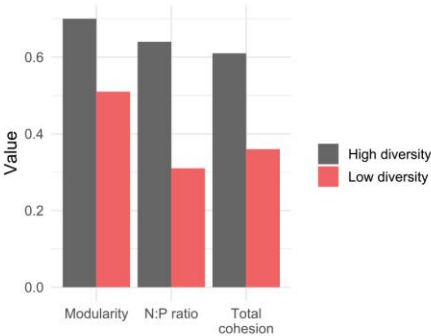

**Supplemental Table 1. Clinical characteristics of patients in the higher- and lower-diversity groups based on diversity before allo-HSCT.** Wilcoxon rank-sum test and Fisher’s exact test were used to compare continuous and categorical clinical and GM features, respectively (HSCT = hematopoietic stem cell transplantation; MDS = myelodysplastic syndrome; JMML = juvenile myelomonocytic leukaemia; PBSC = peripheral blood stem cell).

|                                      | Lower diversity | Higher diversity | p     |
|--------------------------------------|-----------------|------------------|-------|
|                                      | (N = 45)        | (N = 45)         |       |
| Age at HSCT – y (± SD)               | 8.00 ± 6.1      | 10.06 ± 4.8      | 0.080 |
| Male sex - no. (%)                   | 30 (67)         | 23 (53)          | 0.134 |
| <b>Disease - no. (%)</b>             |                 |                  | 0.431 |
| Acute lymphoblastic leukemia         | 20 (44)         | 13 (29)          |       |
| Acute myeloid leukemia               | 7 (16)          | 12 (27)          |       |
| Non-Hodgkin lymphoma                 | 1 (2)           | 1 (2)            |       |
| MDS or JMML                          | 6 (13)          | 4 (9)            |       |
| Non-malignant disease                | 11 (24)         | 15 (33)          |       |
| <b>Type of donor (%)</b>             |                 |                  | 0.592 |
| Unrelated                            | 28 (62)         | 27 (60)          |       |
| Familiar haploidentical              | 8 (18)          | 10 (22)          |       |
| Identical sibling                    | 9 (20)          | 8 (18)           |       |
| <b>Stem cell source (%)</b>          |                 |                  | 0.861 |
| Bone marrow                          | 24 (69)         | 34 (76)          |       |
| PBSC                                 | 10 (29)         | 11 (24)          |       |
| Cord blood                           | 1 (3)           | 0 (0)            |       |
| <b>Intensity of conditioning (%)</b> |                 |                  |       |
| Ablative                             | 43 (96)         | 40 (89)          | 0.237 |
| Reduced intensity                    | 2 (4)           | 5 (11)           |       |
| <b>Follow-up of survivors — mo.</b>  |                 |                  |       |
| Median                               | 46.3            | 57.0             | 0.145 |
| Interquartile range                  | 23.5-65.5       | 31.0-79.0        |       |
| Pre-HSCT diversity (Shannon) (± SD)  | 2.15 ± 0.52     | 3.00 ± 0.31      | 0.002 |
| <b>Center – no. (%)</b>              |                 |                  |       |
| Bologna                              | 21 (47)         | 29 (64)          | 0.011 |
| Wroclaw                              | 10 (22)         | 5 (11)           |       |
| Verona                               | 2 (4)           | 3 (7)            |       |
| Roma                                 | 1 (2)           | 6 (13)           |       |
| Pavia                                | 11 (24)         | 2 (4)            |       |

**Supplemental Table 2. Clinical characteristics of patients in the higher- and lower-diversity groups based on diversity at neutrophil engraftment.** Wilcoxon rank-sum test and Fisher’s exact test were used to compare continuous and categorical clinical and GM features, respectively (HSCT = hematopoietic stem cell transplantation; MDS = myelodysplastic syndrome; JMML = juvenile myelomonocytic leukaemia; PBSC = peripheral blood stem cell).

|                                           | Lower diversity | Higher diversity | p      |
|-------------------------------------------|-----------------|------------------|--------|
|                                           | (N = 45)        | (N = 45)         |        |
| Age at HSCT – y (± SD)                    | 7.54 ± 5.8      | 10.52 ± 4.9      | 0.010  |
| Male sex - no. (%)                        | 22 (49)         | 31 (69)          | 0.054  |
| <b>Disease - no. (%)</b>                  |                 |                  | 0.543  |
| Acute lymphoblastic leukemia              | 18 (40)         | 16 (36)          |        |
| Acute myeloid leukemia                    | 7 (16)          | 10 (22)          |        |
| Non-Hodgkin lymphoma                      | 0 (0)           | 1 (2)            |        |
| MDS or JMML                               | 7 (16)          | 4 (9)            |        |
| Non-malignant disease                     | 13 (29)         | 14 (31)          |        |
| <b>Type of donor (%)</b>                  |                 |                  | 0.488  |
| Unrelated                                 | 27 (60)         | 28 (62)          |        |
| Familiar haploidentical                   | 11 (24)         | 7 (16)           |        |
| Identical sibling                         | 7 (16)          | 1 (22)           |        |
| <b>Stem cell source (%)</b>               |                 |                  | 0.257  |
| Bone marrow                               | 31 (69)         | 37 (82)          |        |
| PBSC                                      | 13 (29)         | 8 (18)           |        |
| Cord blood                                | 1 (2)           | 0 (0)            |        |
| <b>Intensity of conditioning (%)</b>      |                 |                  |        |
| Ablative                                  | 42 (93)         | 41 (91)          | 0.694  |
| Reduced intensity                         | 3 (7)           | 4 (9)            |        |
| <b>Follow-up of survivors — mo.</b>       |                 |                  |        |
| Median                                    | 41.5            | 44.8             | 0.799  |
| Interquartile range                       | 23-78           | 24.0-77          |        |
| Diversity at engraftment (Shannon) (± SD) | 1.50 ± 0.40     | 2.64 ± 0.44      | <0.001 |
| <b>Center – no. (%)</b>                   |                 |                  |        |
| Bologna                                   | 19 (42)         | 31 (69)          | 0.051  |
| Wroclaw                                   | 10 (22)         | 5 (11)           |        |
| Verona                                    | 5 (11)          | 0 (0)            |        |
| Roma                                      | 4 (9)           | 3 (7)            |        |
| Pavia                                     | 7 (16)          | 6 (13)           |        |

**Supplemental Table 3. Association of transplant characteristics with overall survival.** CI = confidence interval; OS = overall survival; PBSC = peripheral blood stem cell; SE = standard error.

| Variable                  | Hazard Ratio (95% CI) | p     |
|---------------------------|-----------------------|-------|
| Age (continuous)          | 1.07 (0.99-1.16)      | 0.090 |
| Type of donor             | OS (at 52 months)     | 0.539 |
| Unrelated                 | 74.6 ± 6.3 (SE)       |       |
| Familiar haploidentical   | 70.0 ± 11.5 (SE)      |       |
| Identical sibling         | 88.2 ± 7.8 (SE)       |       |
| Stem cell source          |                       | 0.862 |
| Bone marrow               | 76.1 ± 5.6 (SE)       |       |
| PBSC                      | 76.2 ± 9.3 (SE)       |       |
| Cord blood                | 100.0 ± 7.8 (SE)      |       |
| Intensity of conditioning |                       | 0.714 |
| Ablative                  | 75.7 ± 5.0 (SE)       |       |
| Reduced intensity         | 85.7 ± 13.2 (SE)      |       |

**Supplemental Table 4. Association of pre-allo-HSCT gut microbiota diversity with relevant clinical variables.** aGvHD = acute graft-versus-host disease; BSI = bloodstream infection; TRM = transplant-related mortality.

| Variable                  | No. of events | No. of patients | Univariate analysis | Multivariate analysis* |
|---------------------------|---------------|-----------------|---------------------|------------------------|
| <b>Death</b>              | 20            | 90              |                     |                        |
| Lower diversity           |               |                 | Reference           |                        |
| Higher diversity          |               |                 | 0.29 (0.11-0.80)    | 0.26 (0.09-0.75)       |
| <b>TRM</b>                | 11            | 90              |                     |                        |
| Lower diversity           |               |                 | Reference           |                        |
| Higher diversity          |               |                 | 0.51 (0.15-1.75)    |                        |
| <b>aGvHD any grade</b>    | 44            | 90              |                     |                        |
| Lower diversity           |               |                 | Reference           |                        |
| Higher diversity          |               |                 | 0.56 (0.30-1.06)    |                        |
| <b>aGvHD grade II-IV</b>  | 29            | 90              |                     |                        |
| Lower diversity           |               |                 | Reference           |                        |
| Higher diversity          |               |                 | 0.38 (0.17-0.83)    | 0.31 (0.14-0.71)       |
| <b>aGvHD grade III-IV</b> | 14            | 90              |                     |                        |
| Lower diversity           |               |                 | Reference           |                        |
| Higher diversity          |               |                 | 0.10 (0.01-0.77)    | 0.06 (0.08-0.53)       |
| <b>Gut aGvHD</b>          | 16            | 90              |                     |                        |
| Lower diversity           |               |                 | Reference           |                        |
| Higher diversity          |               |                 | 0.40 (0.14-1.16)    |                        |
| <b>BSI</b>                | 24            | 90              |                     |                        |
| Lower diversity           |               |                 | Reference           |                        |
| Higher diversity          |               |                 | 0.81 (0.36-1.81)    |                        |
| <b>Relapse</b>            | 25            | 90              |                     |                        |
| Lower diversity           |               |                 | Reference           |                        |
| Higher diversity          |               |                 | 0.45 (0.17-1.20)    |                        |

\*Multivariate Cox proportional-hazards were calculated with multivariate models adjusted for age, graft source, donor type, intensity of conditioning regimen, center, and oncological versus non-oncological disease.

**Supplemental Table 5. Association of gut microbiota diversity at neutrophil engraftment with relevant clinical variables.** aGvHD = acute graft-versus-host disease; BSI = bloodstream infection; CI = cumulative incidence; OS = overall survival; RFS = relapse-free survival; SE = standard error; TRM = transplant-related mortality.

| Variable                        | Proportion Surviving/<br>Cumulative incidence | p     |
|---------------------------------|-----------------------------------------------|-------|
| <b>OS</b>                       |                                               | 0.931 |
| Lower diversity                 | 76.0 ± 6.9 (SE)                               |       |
| Higher diversity                | 76.5 ± 6.7 (SE)                               |       |
| <b>RFS</b>                      |                                               | 0.678 |
| Lower diversity                 | 73.9 ± 7.0 (SE)                               |       |
| Higher diversity                | 68.9 ± 6.9 (SE)                               |       |
| <b>CI of any grade aGvHD</b>    |                                               | 0.490 |
| Lower diversity                 | 40.0 ± 7.3 (SE)                               |       |
| Higher diversity                | 48.9 ± 7.5 (SE)                               |       |
| <b>CI of aGvHD grade II-IV</b>  |                                               | 0.483 |
| Lower diversity                 | 28.9 ± 6.8 (SE)                               |       |
| Higher diversity                | 35.6 ± 7.1 (SE)                               |       |
| <b>CI of aGvHD grade III-IV</b> |                                               | 0.485 |
| Lower diversity                 | 13.3 ± 5.1 (SE)                               |       |
| Higher diversity                | 8.9 ± 4.2 (SE)                                |       |
| <b>CI of Gut aGvHD</b>          |                                               | 1.000 |
| Lower diversity                 | 17.8 ± 5.7 (SE)                               |       |
| Higher diversity                | 17.8 ± 5.7 (SE)                               |       |
| <b>CI of BSI</b>                |                                               | 0.747 |
| Lower diversity                 | 20.9 ± 6.2 (SE)                               |       |
| Higher diversity                | 23.8 ± 6.6 (SE)                               |       |
| <b>CI of TRM</b>                |                                               | 0.526 |
| Lower diversity                 | 10.9 ± 5.4 (SE)                               |       |
| Higher diversity                | 13.3 ± 5.0 (SE)                               |       |
| <b>CI of Relapse</b>            |                                               | 0.616 |
| Lower diversity                 | 15.6 ± 5.4 (SE)                               |       |
| Higher diversity                | 22.2 ± 6.2 (SE)                               |       |
